# Supplementary material
Source: PubMed Central journal article supplement (PMC5839972)
Supplement: NIHMS929904-supplement-1.pdf [file NIHMS929904-supplement-1.pdf]

## Supplemental Figure Legends.

**Figure S1. Identification of *MeXis* as an LXR target gene.** **A.** Real-time PCR analysis of gene expression in mouse primary cell lines treated with GW3965 (GW, 0.5  $\mu$ M). N=3 per group. Values are means  $\pm$  SD. **B.** RNA-seq results for protein-coding genes in primary macrophages treated for 16 h with GW3965 (GW, 0.25  $\mu$ M). Each dot is a single gene. Red dots, for both coding and non-coding genes, highlight genes that are expressed (FPKM $\geq$ 1) and were at least two-fold unregulated after treatment. A single sample per group pooled from 3 different experiments sequenced. **C.** Network of ontology terms for GW3965-induced protein-coding genes in macrophages. Nodes with the same color are specific ontologies in the same GO generic class as labeled. Node size is proportional to statistical significance (hypergeometric p-value). Edge thickness is proportional to between-node similarity (computed using Kappa statistics, and reflects the overlap between the gene sets annotated in both ontology terms). **D.** RNA-seq results for noncoding RNAs in primary macrophages from experiments in A. Each dot is a single gene. Red dots, for both coding and non-coding genes, highlight genes that are expressed (FPKM $\geq$ 1) and were at least two-fold unregulated after treatment. Neighboring protein-coding gene are shown in brackets for select genes. A single sample per group pooled from 3 different experiments sequenced.

**Figure S2. Schematic of the *MeXis* gene locus and its RNA transcripts.** UCSC genome browser view of RNA-seq transcriptional signatures at the *MeXis* locus in mouse primary peritoneal macrophages treated with GW3965 (GW, 0.25  $\mu$ M). Structure of transcripts identified by RACE, aligned for comparison to existing annotation in the indicated databases.

**Figure S3. Regulation of *MeXis* by LXR in macrophages.** **A.** RNA copy number analysis of *MeXis* from primary macrophages (n= 8 samples). Values are mean  $\pm$  SD. **B.** Gene expression from primary macrophages treated with endogenous ligand 22(R)-hydroxycholesterol (22R, 2.5  $\mu$ M), or 25-hydroxycholesterol (25OH, 2.5  $\mu$ M). (n= 3 samples per group). Values are mean  $\pm$  SD. \* P < 0.05, \*\*\*\* P < 0.0001 using one-way ANOVA followed by multiple comparisons test (Dunnett's). **C.** Gene expression from WAT isolated from WT mice treated with vehicle or GW3965 (40 mg/kg) by gavage for 3 days (n=5 samples per group). Values are mean  $\pm$  SEM. **D.** Real-time PCR analysis of gene expression in primary mouse macrophages treated with GW3965 (GW, 0.5  $\mu$ M). N=4 per group. Experiment repeated once with similar results. Values are means  $\pm$  SEM. **E.** Gene expression analysis of iBMDM treated with GW3965 (GW, 0.5  $\mu$ M). N= 4 samples per group from two independent experiments. All Values are means  $\pm$  SD. \*\* P < 0.01 using two sample two-tailed student's t-test.

**Figure S4. *MeXis* is a predominantly nuclear RNA.** **A.** In vitro transcription/translation of *MeXis* (*Mex*), luciferase (*luc*), no plasmid (NP). Experiment was performed once. **B.** RNA FISH in mouse macrophages (*MeXis* green & DAPI blue). Representative image from three experiments. Scale bars, 25  $\mu$ m. **C.** Primary mouse macrophages were treated with GW (1  $\mu$ M GW3965). 24 h later cellular contents were separated. Transcripts in each fraction were analyzed by real-time PCR. N=4 samples/group. Values are means  $\pm$  SD. **D.** Cellular fractionation from RAW-*MeXis* stable cell line. Transcripts in each fraction were analyzed by real-time PCR. N=4 samples/group. Values are means  $\pm$  SD. **E.** Gene expression from primary mouse macrophages treated ASO (50 nM) for 24 h followed by GW (1  $\mu$ M GW3965) (N=4 samples/group). Values are means  $\pm$  SD. **F-G.**

No acceptor control for efflux experiments from Figures 2c and 2f. Experiments were conducted in triplicate. Values are means  $\pm$  SD. **H.** Florescence signal in primary macrophages treated with acetylated Di-LDL for 4 h. Experiments were conducted in triplicate. Values are means  $\pm$  SD. **I.** Quantification of foam cells from experiments in 2 h expressed as percent of cells showing any oil red staining. Results from 3 different fields per group. Mean  $\pm$  SD. \*\*\*  $P < 0.001$  using two sample two-tailed student's t-test.

**Figure S5. Generation of global *MeXis*<sup>-/-</sup> mice.** **A.** Schematic of knockout strategy. Vector construct designed to ablate entire *MeXis* transcript. Targeted mice were crossed with *Flp* mice to excise the Neo cassette since it contains an active bi-directional promoter. PCR genotyping strategy for *MeXis*. Representative blots from over 10 experiments. **B.** Real-time PCR analysis of gene expression 10 days after stable overexpression of *MeXis* in RAW cells treated with GW3965 (GW, 0.5  $\mu$ M). Results are representative of three independent experiments. Values are means  $\pm$  SD. **C.** Real-time PCR analysis of gene expression from primary macrophages treated with siRNA (50 nM) followed by GW3965 (GW, 0.5  $\mu$ M) and the RXR ligand LG268 (LG, 50 nM) and harvested 36 h later. Results are representative of four independent experiments. Values are means  $\pm$  SD. \*\*\*\*  $P < 0.0001$  by Two-way ANOVA followed by multiple comparisons test (Sidak's). **D.** Real-time PCR analysis of gene expression in primary mouse macrophages. Results are representative of four independent experiments. Values are means  $\pm$  SD.

**Figure S6. Metabolic profile of *MeXis*<sup>-/-</sup> mice.** Total serum cholesterol and triglyceride levels in WT or *MeXis*<sup>-/-</sup> littermates maintained on western diet for 3 weeks. Lipids were measured using Wako kits. WT-M is WT male (n=5 animals). KO-M is *MeXis*<sup>-/-</sup> male (n=5 animals). WT-F is WT female (n=4 animals). KO-F is *MeXis*<sup>-/-</sup> female (n=4 animals). All values are means ± SEM.

**Figure S7. Engraftment of WT or *MeXis*<sup>-/-</sup> bone marrow.** **A.** Confirmation of engraftment by gene expression analysis of experiment in Figure 3A. Representative of 2 samples in WT and 4 samples in *MeXis*<sup>-/-</sup> mice. Representative of 3 samples per group for *Abca1*. Values are mean ± SEM. **B.** Total serum cholesterol and triglyceride levels from mice in experiment 3A from atherosclerosis bone marrow transplant experiment.. N=16 animals per group. Values are means ± SEM. **C.** Percent CD68-positive cells in lesions from LDLR animals transplanted with WT or *MeXis*<sup>-/-</sup>. N= 8 animals per group. Values are means ± SEM. \* P < 0.05 by two-sided student's t-test.

**Figure S8. Mapping of enhancer sites at the *Abca1* locus.** GRO-Seq and ChIP-seq data at the *Abca1* gene locus in mouse primary macrophages. Enhancer sites indicated by arrow and based on mouse mm9 genome build. Similar results were obtained with two biologic replicates.

**Figure S9. Analysis of ATAC-seq in *MeXis*<sup>-/-</sup> macrophages.** **A.** Schematic of mouse crossing strategy related to figure 4b. **B.** ATAC seq analysis showing genome-wide accessibility in WT or *MeXis*<sup>-/-</sup> macrophages with GW stimulation. **C.** Number of statistically significant peaks for established LXR target genes from experiment in Figure 4. **D.** Gene Ontology terms from differentially regulated access-sites from ATAC-seq

between WT or *MeXis*<sup>-/-</sup> macrophages classified by DAVID Functional Annotation Tools (Confidence Interval 95%). N=4 samples per group.

**Figure S10. Retrieval of MeXis by ChIRP probes.** **A.** Complimentary biotin-labeled tiling oligonucleotides were incubated with cellular extracts from mouse macrophages. Probes sets designed to retrieve MeXis or *LacZ*. Percent input of retrieved MeXis and *36b4* are shown. N=2 samples per group. Values are mean ± STD. **B.** ChIRP-Mass-spectrometry results at significance threshold of 0.05 for proteins differentially identified between MeXis or *LacZ* probes. **C.** Schematic of Crispr-cas targeting strategy of two different DDX17 exons using a single guide RNA.

**Figure S11. Noncoding RNAs at human *ABCA1* gene locus.** UCSC genome browser view of the human *ABCA1* gene showing location conservation of *MeXis* and intergenic transcription around *ABCA1* (Hg38 genome build).

**Figure S12. Primer and ASO sequences**

**Figure S13. Antibody information**

**Figure S14. Full-length blots used in manuscript.**

**a**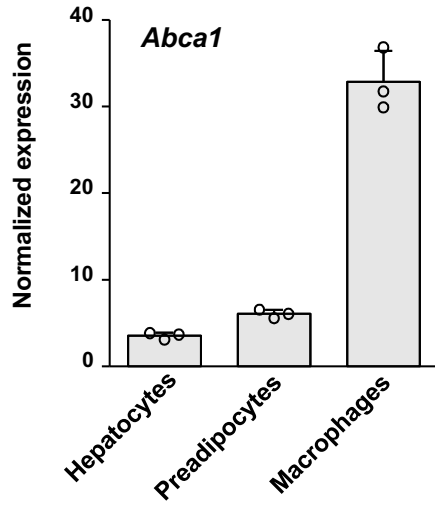**b**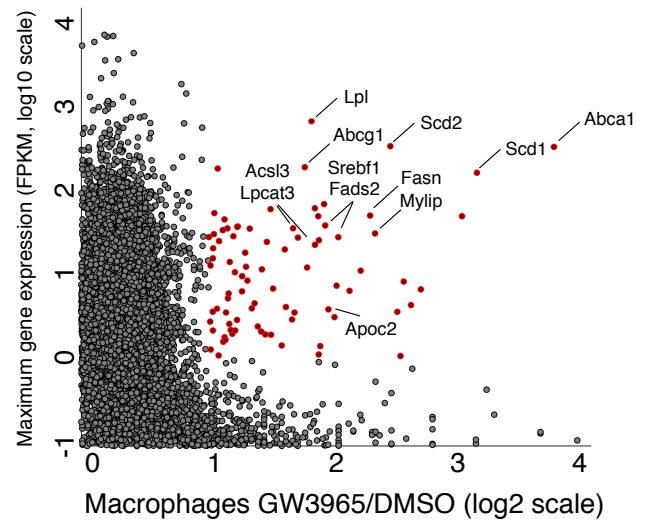**c**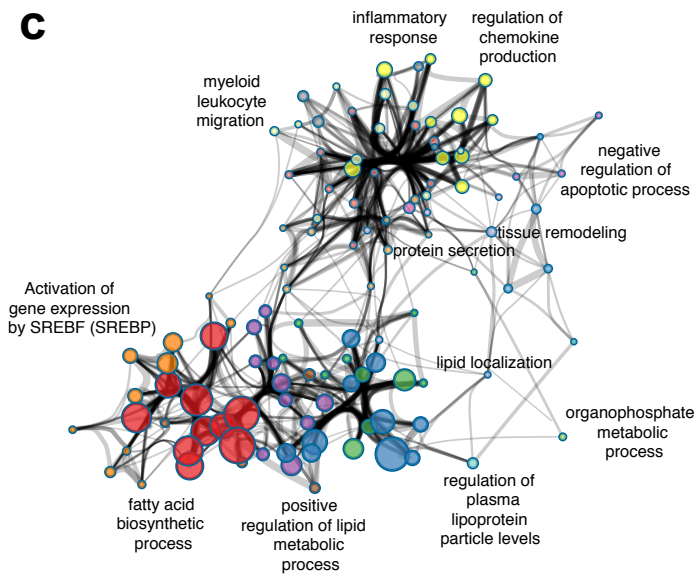**d**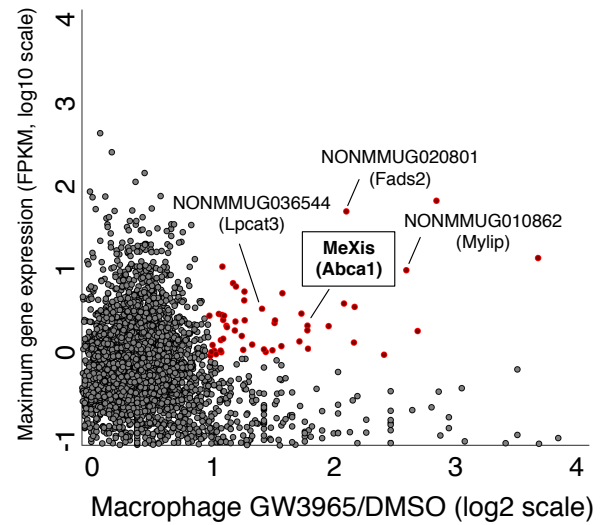

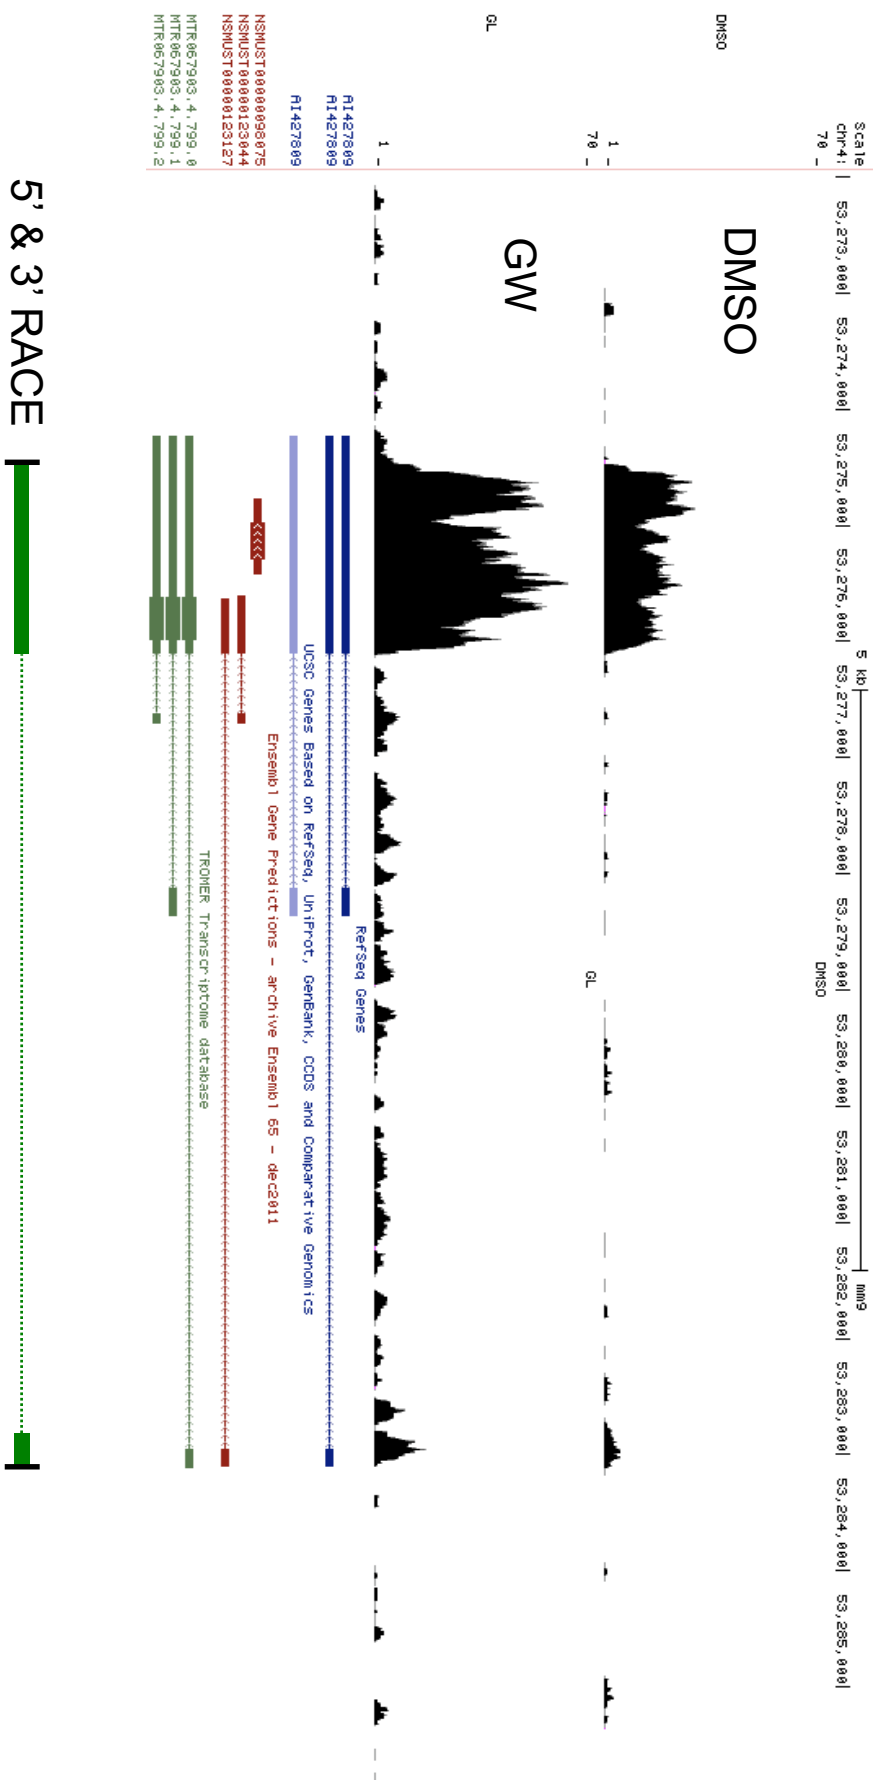

Supplemental Fig. 2

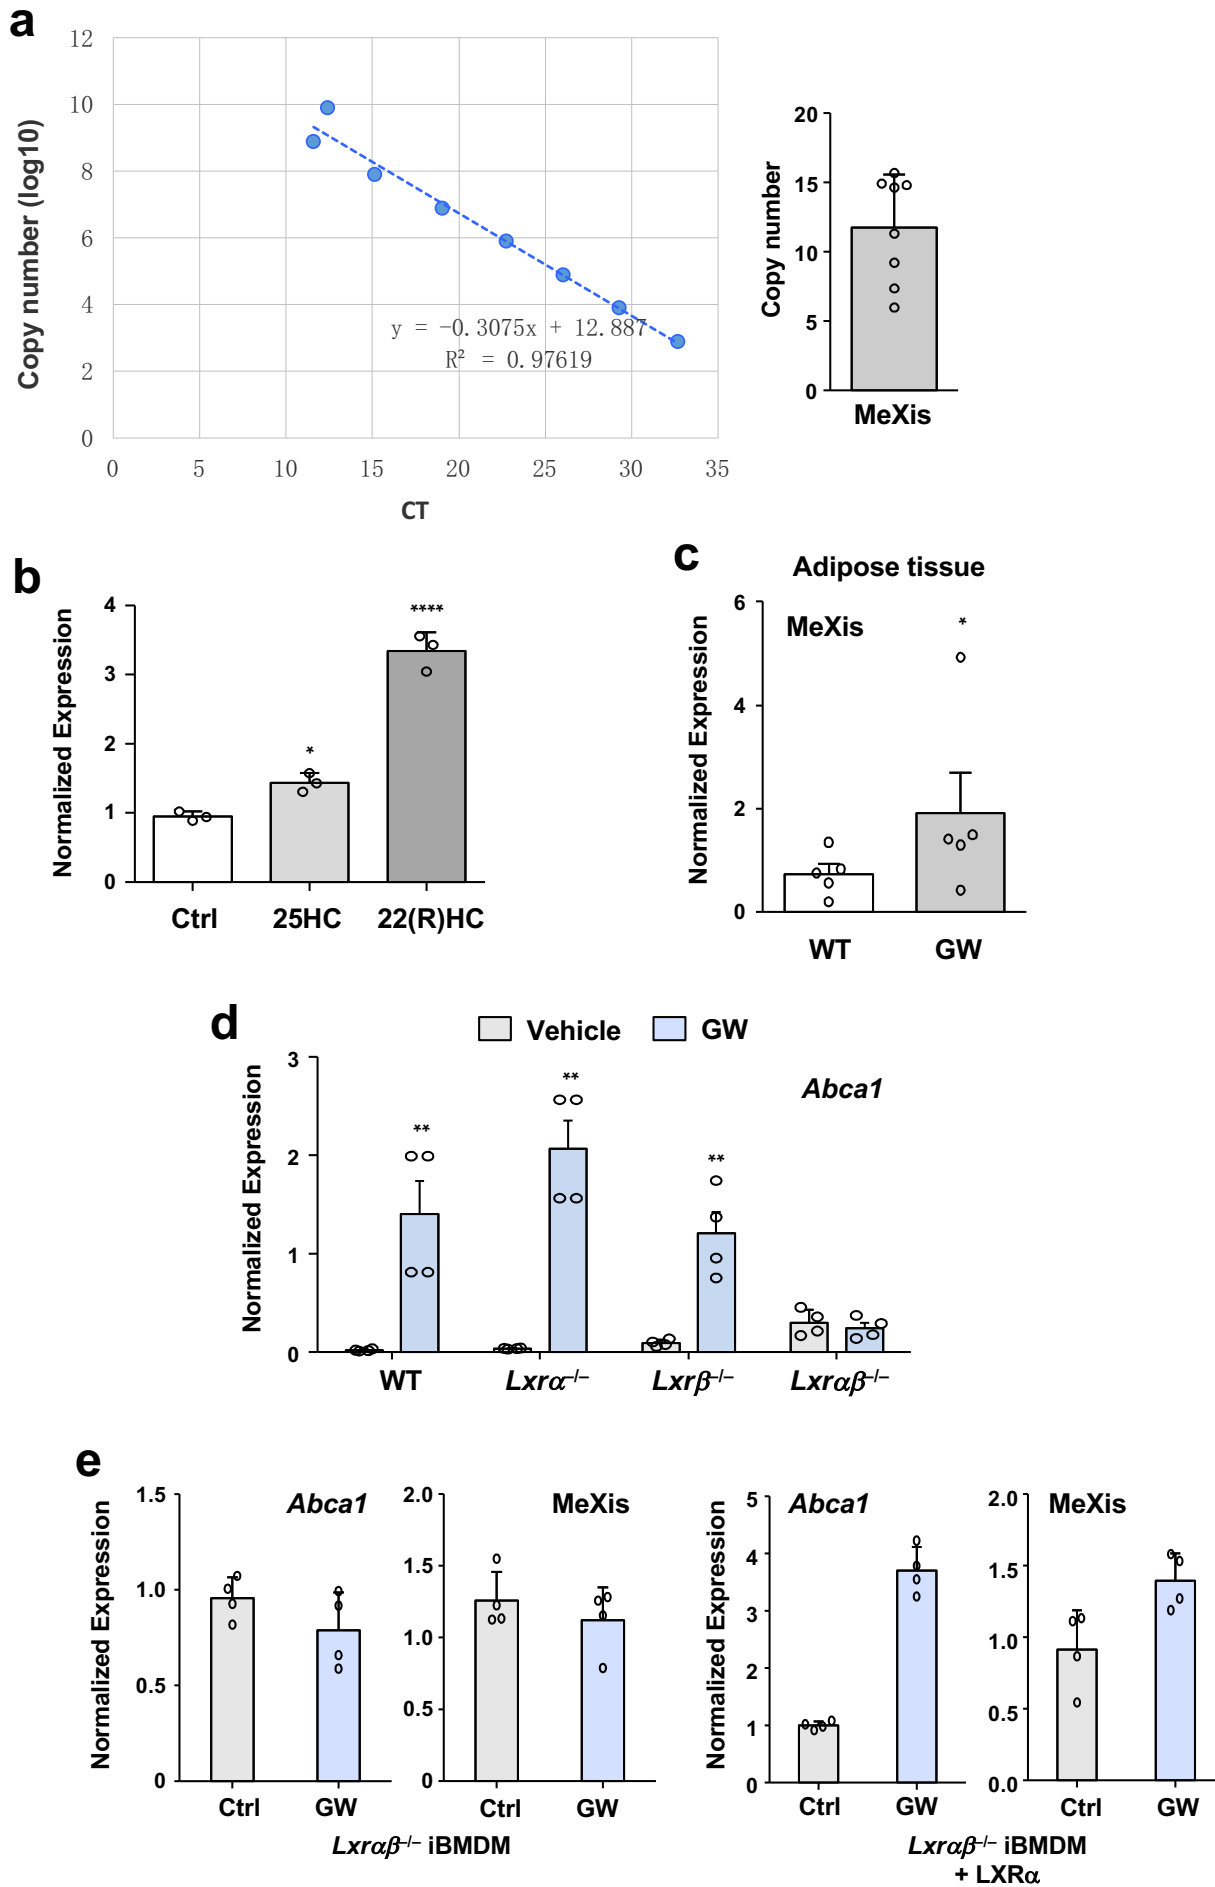

Supplemental Fig. 3



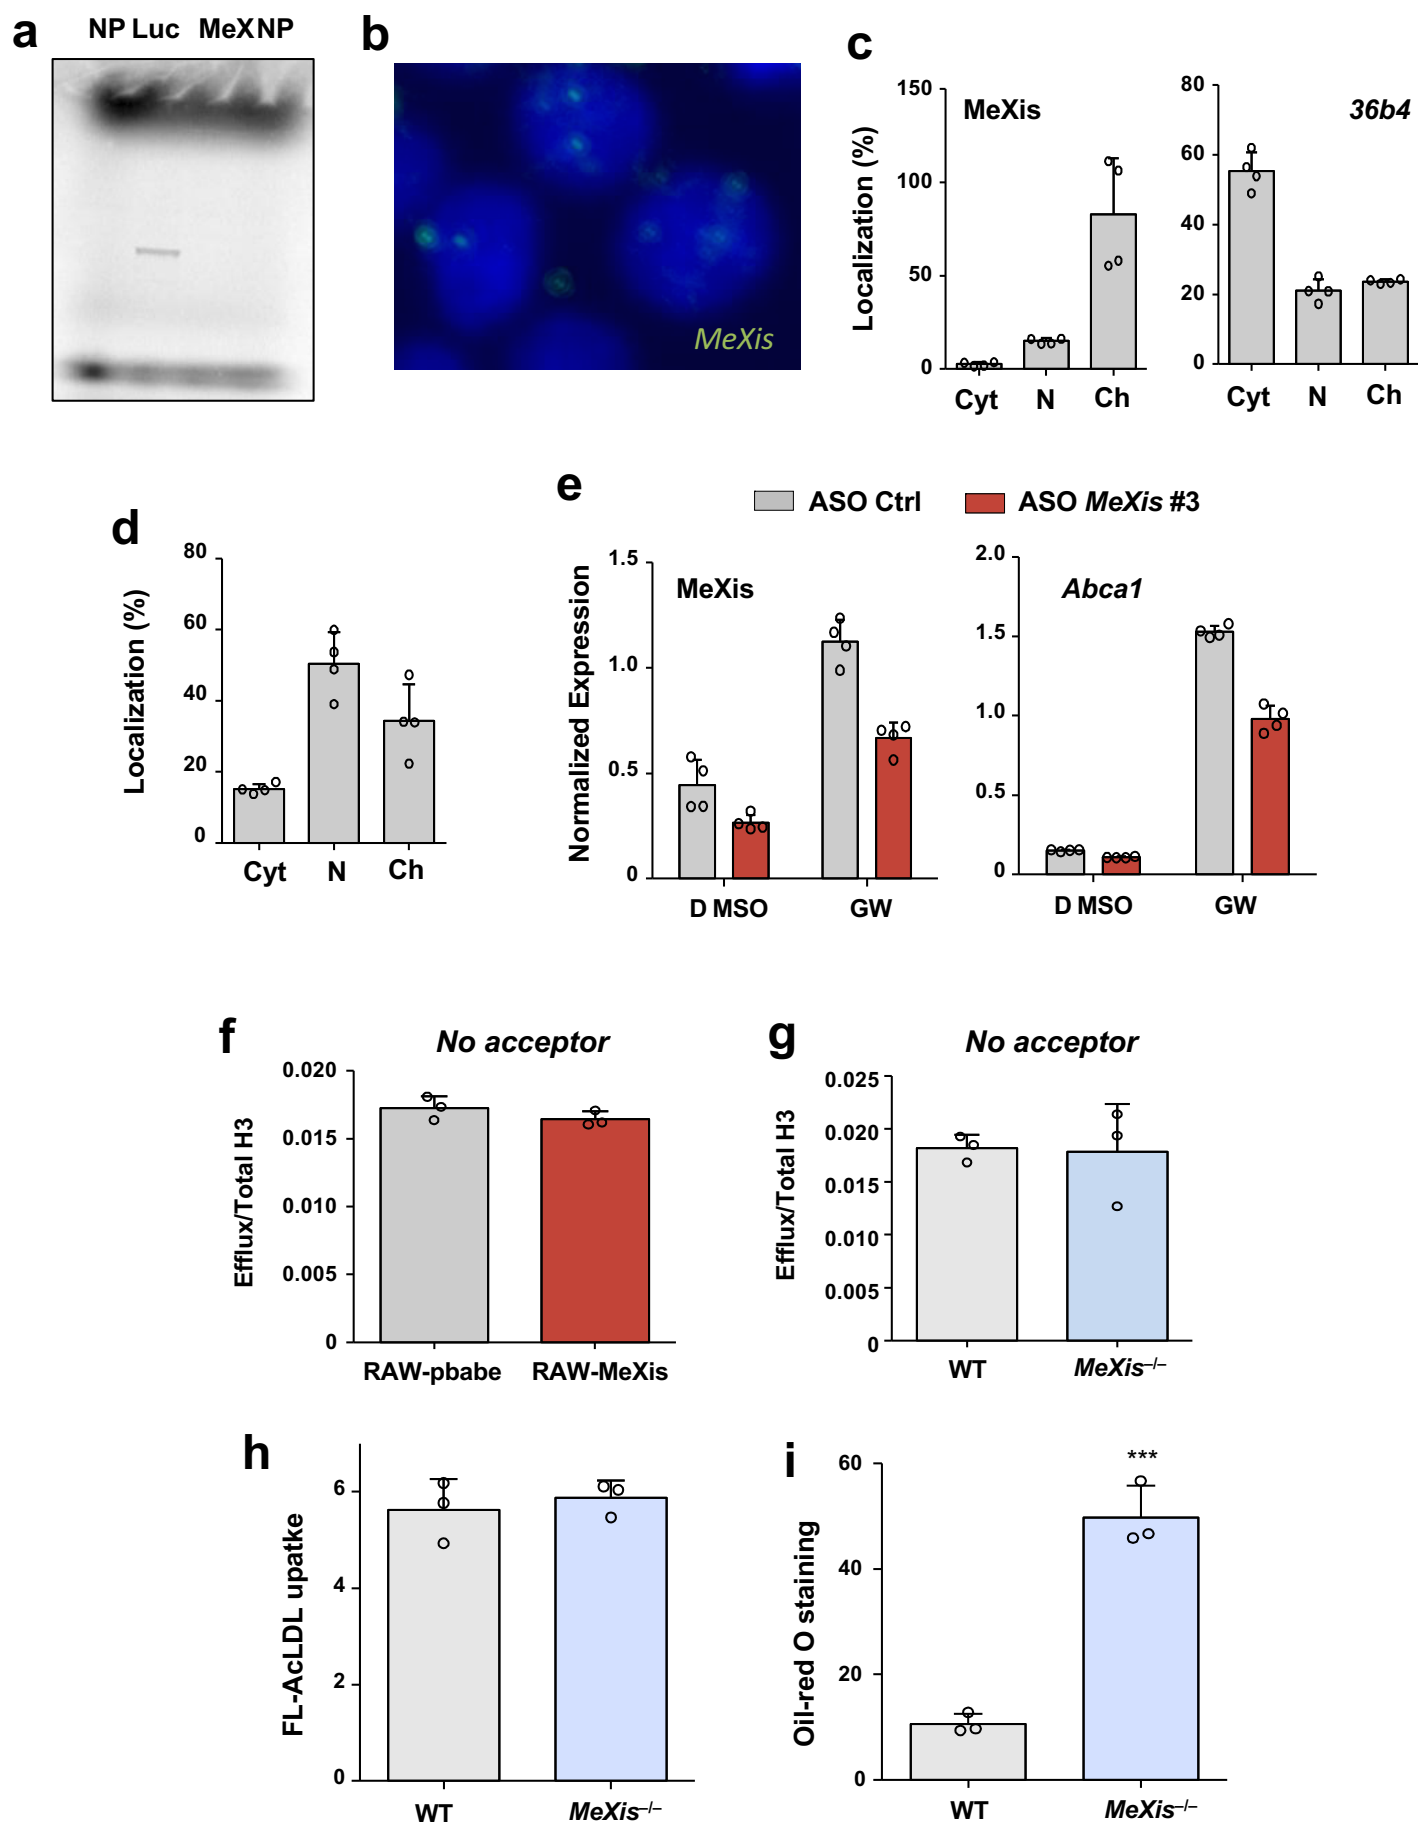

Supplemental Fig. 4

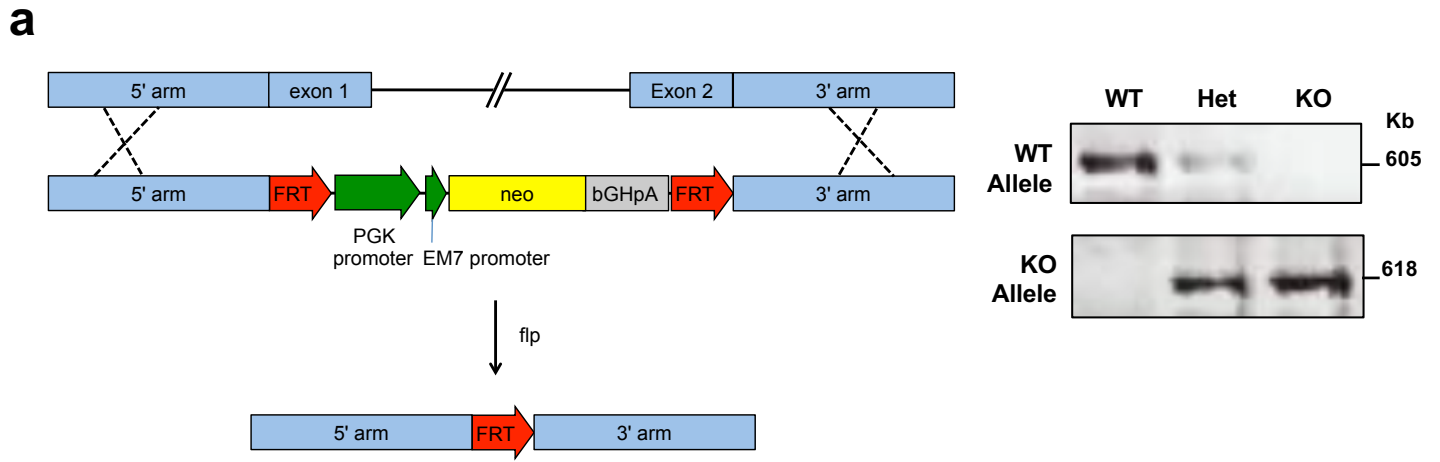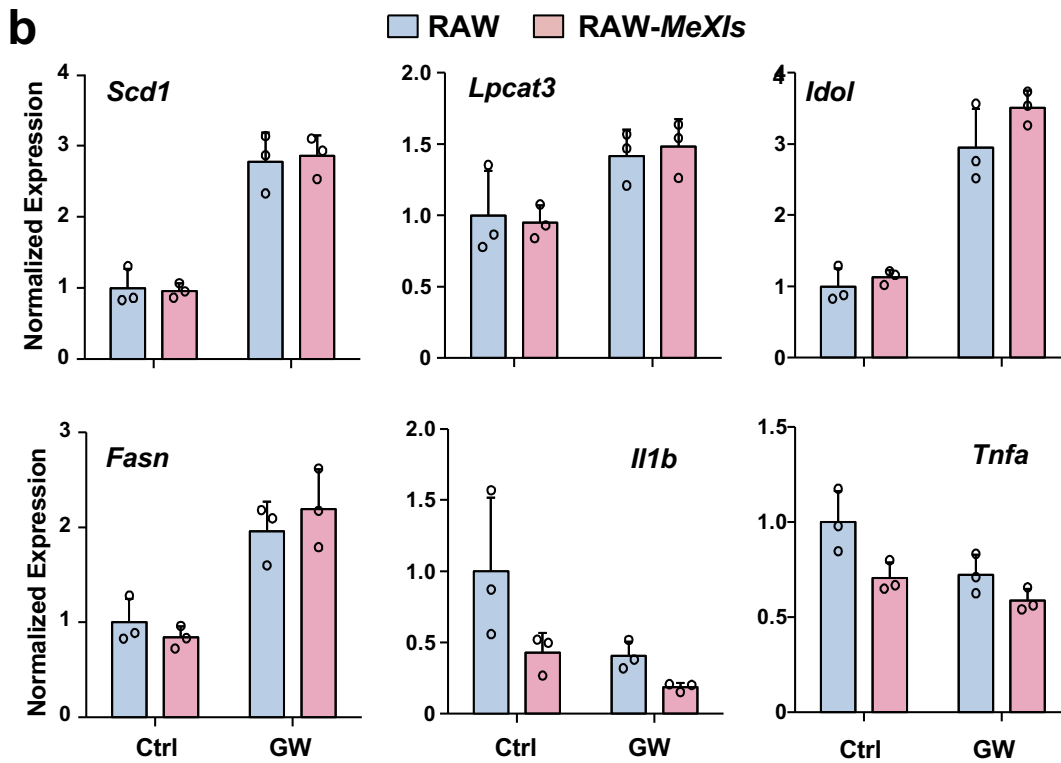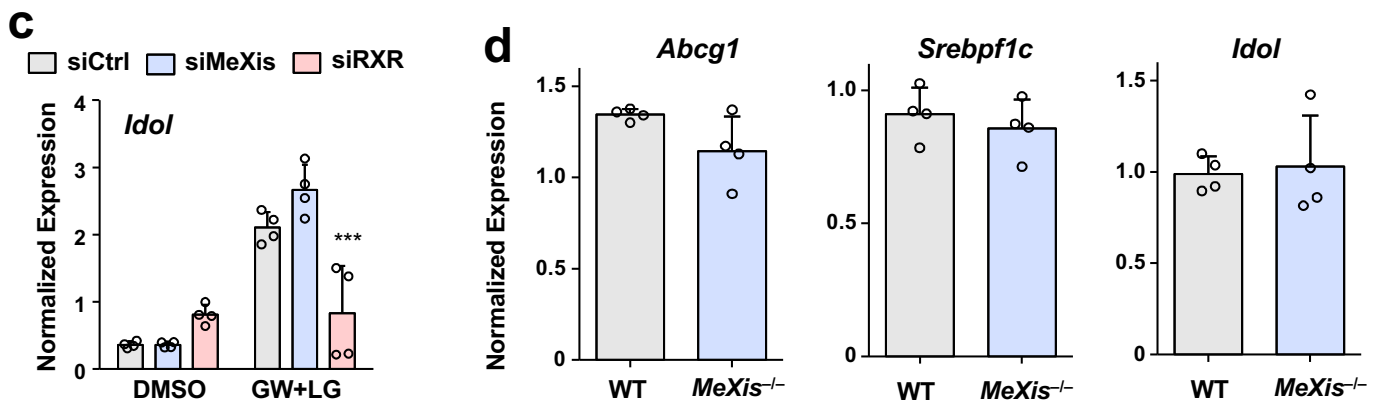

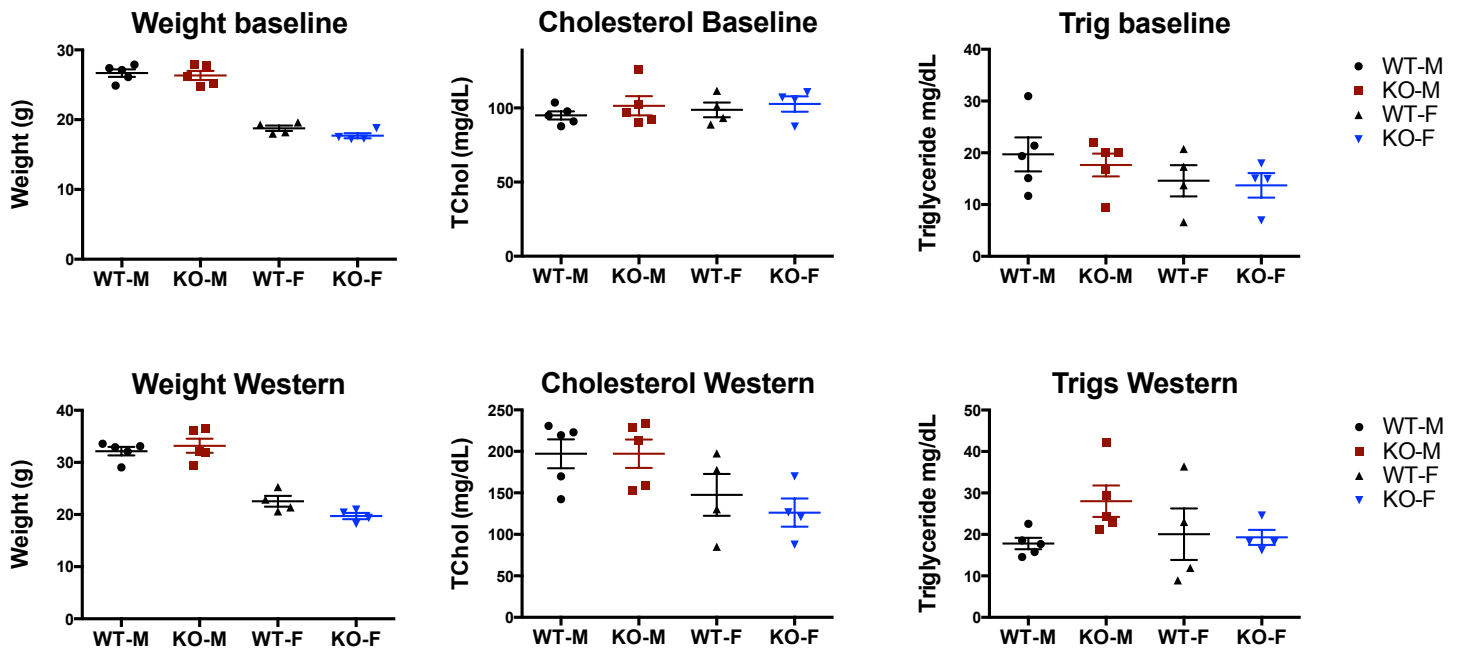

Supplemental Fig. 6

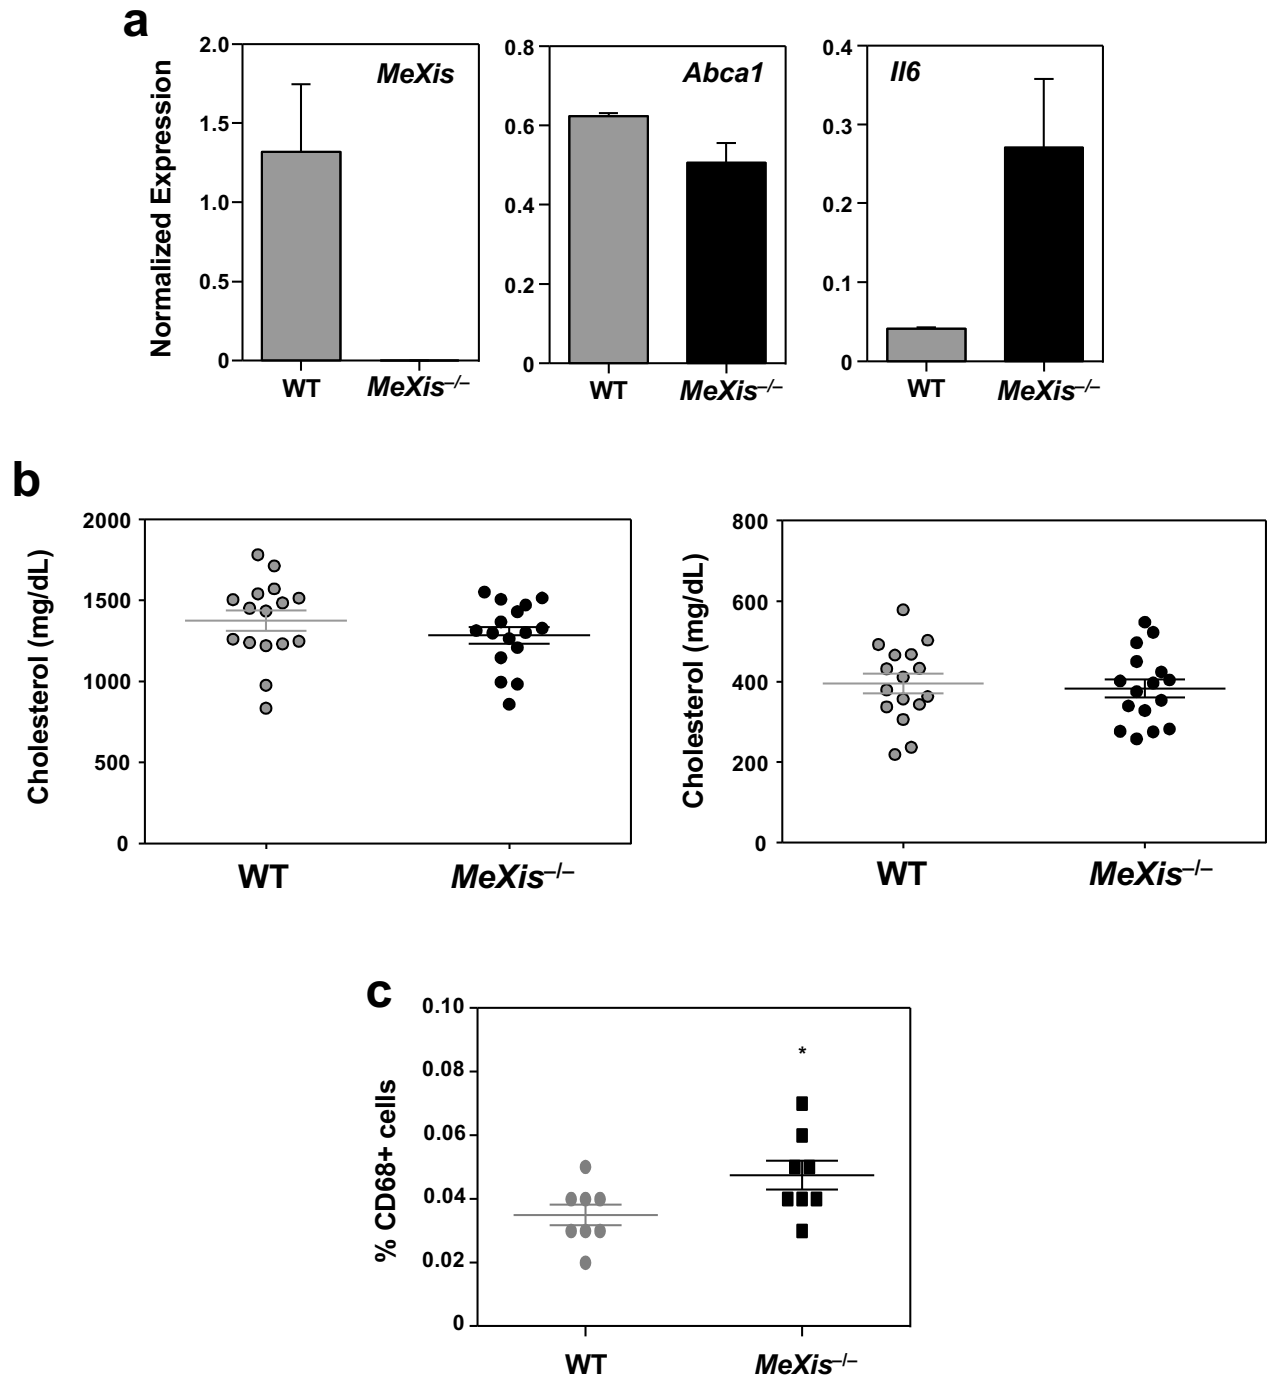



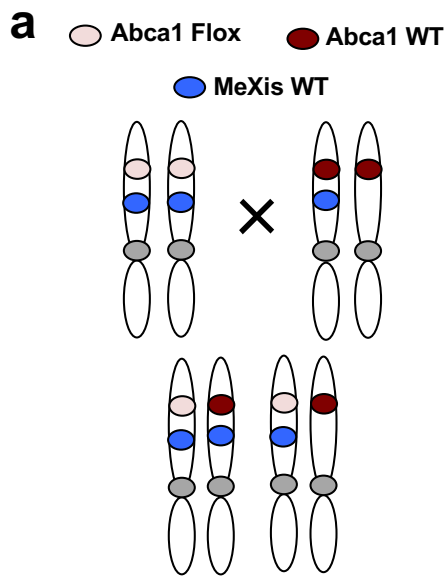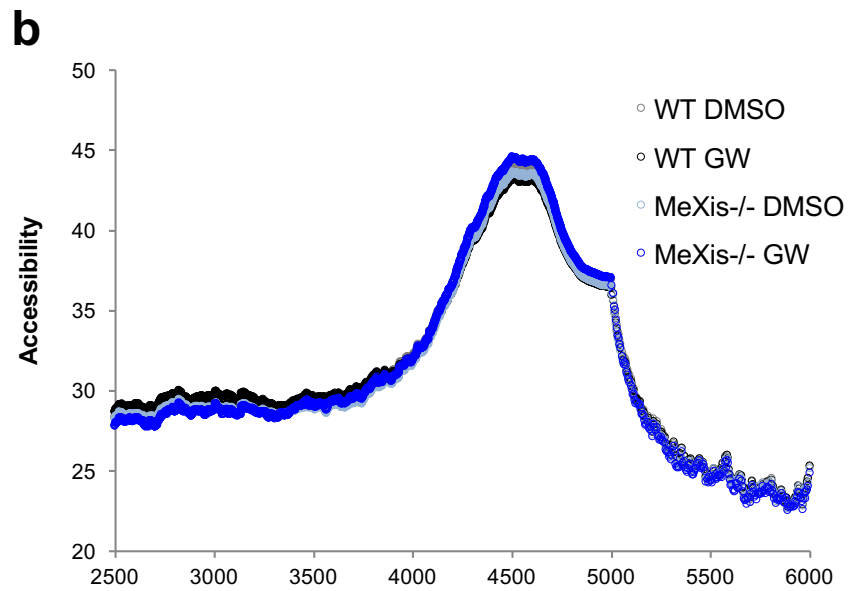

**c**

| Feature      | Number of peaks |
|--------------|-----------------|
| <b>Abca1</b> | <b>6</b>        |
| Abcg1        | 1               |
| Mylip        | 1               |
| Lbp          | 1               |
| Pltp         | 1               |
| MrtK         | 1               |

**d**

| Rank | GO Term                                        | P-Value  |
|------|------------------------------------------------|----------|
| 1    | intracellular signaling cascade                | 5.50E-05 |
| 2    | lipid localization                             | 2.20E-04 |
| 3    | protein kinase cascade                         | 2.50E-04 |
| 4    | cholesterol metabolic process                  | 4.50E-04 |
| 5    | activation of protein kinase activity          | 4.80E-04 |
| 6    | sterol metabolic process                       | 8.00E-04 |
| 7    | regulation of steroid metabolic process        | 8.20E-04 |
| 8    | response to protein stimulus                   | 1.60E-03 |
| 9    | lipid transport                                | 2.50E-03 |
| 10   | positive regulation of protein kinase activity | 3.20E-03 |
| 11   | regulation of steroid biosynthetic process     | 3.50E-03 |
| 12   | reverse cholesterol transport                  | 3.70E-03 |
| 13   | glycerolipid metabolic process                 | 4.00E-03 |

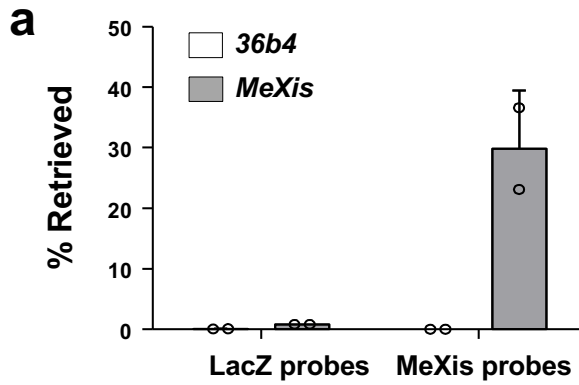

**b**

| Description                                                                                     | Score | Mass   | Pep(sig) |
|-------------------------------------------------------------------------------------------------|-------|--------|----------|
| Heterogeneous nuclear ribonucleoproteins A2/B1 OS=Mus musculus GN=Hnrnpa2b1                     | 63    | 37437  | 2        |
| Heterogeneous nuclear ribonucleoprotein K OS=Mus musculus GN=Hnrnpk                             | 61    | 51230  | 2        |
| Splicing factor, proline- and glutamine-rich OS=Mus musculus GN=Sfpq                            | 52    | 75508  | 3        |
| Heat shock cognate 71 kDa protein OS=Mus musculus GN=Hspa8                                      | 51    | 71055  | 2        |
| Serine/arginine-rich splicing factor 6 OS=Mus musculus GN=Srsf6                                 | 43    | 39116  | 1        |
| 40S ribosomal protein S3 OS=Mus musculus GN=Rps3                                                | 43    | 26828  | 1        |
| Protein 9530053A07Rik OS=Mus musculus GN=9530053A07Rik                                          | 42    | 292361 | 5        |
| GTP-binding nuclear protein Ran OS=Mus musculus GN=1700009N14Rik                                | 31    | 24456  | 1        |
| Desmoplakin OS=Mus musculus GN=Dsp                                                              | 30    | 335158 | 1        |
| Heterogeneous nuclear ribonucleoprotein F OS=Mus musculus GN=Hnrnpf                             | 30    | 46043  | 2        |
| Histone H3.3C OS=Mus musculus GN=H3f3c                                                          | 29    | 15363  | 1        |
| Protein 1700003H04Rik OS=Mus musculus GN=1700003H04Rik                                          | 22    | 22496  | 3        |
| Arf-GAP with SH3 domain, ANK repeat and PH domain-containing protein 2 OS=Mus musculus GN=Asap2 | 21    | 107992 | 1        |
| Heterogeneous nuclear ribonucleoprotein A1 OS=Mus musculus GN=Hnrnpa1                           | 21    | 34289  | 1        |
| ATP-dependent RNA helicase DDX17 OS=Mus musculus GN=Ddx17                                       | 20    | 72981  | 1        |
| 60S ribosomal protein L12 OS=Mus musculus GN=Rpl12                                              | 20    | 17965  | 2        |
| Heterogeneous nuclear ribonucleoprotein M OS=Mus musculus GN=Hnrnmpm                            | 19    | 77940  | 2        |
| Vasohibin-1 OS=Mus musculus GN=Vash1                                                            | 18    | 42020  | 1        |
| Junction plakoglobin OS=Mus musculus GN=Jup                                                     | 16    | 82490  | 1        |
| Protein LKAAEAR1 OS=Mus musculus GN=Lkaaeear1                                                   | 16    | 22113  | 1        |
| Adenylyltransferase and sulfurtransferase MOCS3 OS=Mus musculus GN=Mocs3                        | 16    | 50313  | 1        |
| Elongation factor 2 OS=Mus musculus GN=Eef2                                                     | 15    | 96222  | 1        |

**c**

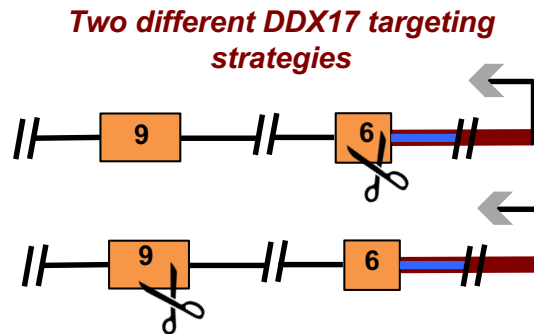

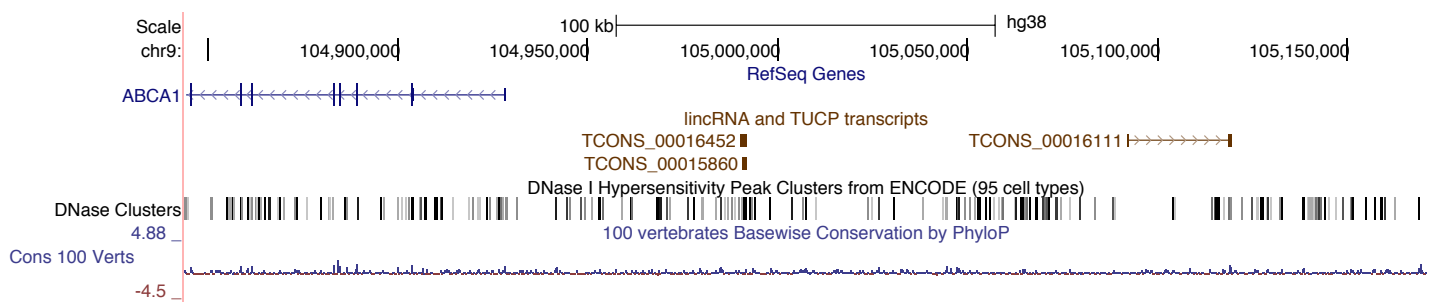

Supplemental Fig. 11



## List of Probes used for ChIRP

### LacZ (5' to 3')

CAAAAACAGAGAAAGGAAACGACAGAGGCCAAAAAGCTC  
 GTATCGGCGGAATTACAGCTGAGCGCCGGTCGTACCATTACCAGTTG  
 CGCGGAAGAAGGCACATGGCTGAATATCGACGGTTTCCATATGGGGA  
 GACTTCCAGTTCAACATCAGCCGCTACAGTCAACAGCAACTGAT  
 CTTCCCGAGCGAAAACGGTCTGCGCTGCGGGACGCGCAATTGA  
 GACCGCCTTACTGCCGCTGTTTTGACCGCTGGGATCTGCCATTGTCA  
 CTGAACTGCCAGCTGGCGCAGGTAGCAGAGCGGGTAAACTGGCTCGGATT  
 ATACAAATCAGCGACACTGAATACGGGGCAACCTCATGTCCGA

### MeXis (5' to 3')

GTGAGGAGCCTCACAGGAAGAGTCCAGTAAGATGGTAAGATGTAACACCGCCTC  
 GATACTCCCGCAAACAGGAAGCCGAGCTCACCTCTACATTTACACAGGGGAA  
 TGTGCAGGATCTCTGATGTGCAGGATCTCTGATATGCAGGGTCTCTGATGTGCAGG  
 GCAGGGTCTCTGATTGCAGGATCTCTGATTGCAGGATCTCTGATGTGCAGGGT  
 AGCAGGTAGAACAAGTGCAGGGATCTGGAACCGCCAGATGCTGTGTG  
 CAGCCGCCCTGAGCTCTATGCCAGCTGCAGCTAGATGTGTACAGAACA  
 GAGCTACACGGGCTCGGAAAGGCAAGGCAGGTGACAGACTGGTGGGAGGTGAGTGCC  
 CTGCTGCAAGAATTCTCTGATGCCAGATAGATTGGAGGGCAAGGGCAGAG

### Primers for ChIRP-qPCR

Related to figure 5c the sites below were differentially regulated between WT & *MeXis*<sup>-/-</sup> by ATAC-seq

| Primer | Genomic Location       | Forward Primer       | Reverse Primer           |
|--------|------------------------|----------------------|--------------------------|
| site 1 | chr4:53163326-53163798 | AAACTGCGTGATCTGCGGT  | GTTGGACCTATTTCCCGCT      |
| site 2 | chr4:53115888-53116119 | GTCATGCCGACCTTCTTCA  | ACATATGTGTGCATGTAGGTCAGA |
| site 3 | chr4:53043420-53043755 | TTGAAGTAGCACCCCGAGTC | CTCTCATCGTGGTGCAAGT      |
| site 4 | chr4:53121153-53121554 | AAGCTTTCGGGGGAACAACA | GGCTTTGCATCTTAGGGTCC     |
| site 5 | chr4:53134685-53135226 | GCCACACCACAGAACCGATA | TAGGGACAATCCCTCCGGTT     |
| site 6 | chr4:53101867-53102217 | AAAGGCACAGACTGCAT    | TAGGGGGCACTTGAAGGGGA     |

### Primers for qPCR

Primers for enhancer RNA expression at ABCA1 related to figure 4a and S8

| Primer   | Forward                 | Reverse                  |
|----------|-------------------------|--------------------------|
| E1       | AAAGGGGCTGGAAATAATCACAC | GAATGAGGAATTGGAAGCCGTG   |
| E2       | GGGACCTCGTAGGTGTCAAG    | ACGGCTGGCAAGAGTAGAAT     |
| E3       | TGAGCAGACAGGCTCACAAG    | AGCCTCAAAGCAGTCCTTCC     |
| E4 (TSS) | GCCTTCGGGAAACGGGAA      | AGAGGAGTTTAGAGAACGAGCTTT |
| E5       | GGATGGATGACTCGAGTGTGTTG | CCTTCTTAAGTGGGTAAGTGC    |
| E6       | GCTACAAAGGGTCAAGTCTG    | TAAACATCACAAAAATCAGTTGC  |
| E7       | TAGTTGTTAGATCCGGCTCCTC  | GGAGCACATTCGAGCGAGA      |
| E8       | ACTATGATCAAGGAAGGTGTGAT | CCTTCTGGTACTACATCATCCT   |
| E9       | ACTGCCAGAAGCCAACGTAA    | TCCTGTGCCACAAAAGTCTAA    |

### Primers for ChIP-qPCR

Primers for LXR binding sites at Abca1 related to figure 5b

| Primer | Forward               | Reverse                  |
|--------|-----------------------|--------------------------|
| site 1 | GCCTTCGGGAAACGGGAA    | AGAGGAGTTTAGAGAACGAGCTTT |
| site 2 | GGGGAAAGAGGGAGAGAACAG | GAATTAAGTGGTTTTGGCCGC    |
| site 3 | AGTTTCAAACAACCCGGGA   | CCCCTGGGTACAGGGGATTA     |

### Antisense Oligonucleotides

| ASO                 | Sequence                                          |
|---------------------|---------------------------------------------------|
| ASO#3 MeXis         | mA*mU*mC*mU*mC*T*G*A*T*G*T*G*C*A*G*mG*mG*mU*mC*mU |
| ASO#2 TCONS00016111 | mC*mU*mG*mG*mC*A*G*C*T*T*C*C*A*T*mC*mU*mC*mG*mU   |
| ASO#3 TCONS00016111 | mG*mU*mG*mU*mC*C*A*T*C*T*C*C*C*A*mU*mC*mG*mU*ma   |

### **Antibodies for ChIP**

| <b>Antibody</b> | <b>Vendor</b>                | <b>Catolog/Institution</b> | <b>Concentration</b> |
|-----------------|------------------------------|----------------------------|----------------------|
| Flag            | SIGMA                        | #F3165                     | 3ug/IP               |
| H3K27Ac         | Abcam                        | #ab4729                    | 3 ug/IP              |
| LXR             | Gift from Knut R. Steffensen | Karolinska                 | 5 ug/IP              |
| DDX17           | Gift from Douglas Black      | UCLA                       | 5 ug/IP              |

### **Primary Antibodies**

| <b>Antibody</b> | <b>Vendor</b>           | <b>Catolog/Institution</b> | <b>Concentration</b> |
|-----------------|-------------------------|----------------------------|----------------------|
| Abca1           | Novus                   | NB400-105                  | 1:000                |
| Actin           | Sigma                   | A2066                      | 1:10000              |
| CD68            | AbD                     | MCA1957GA                  | 1:4000               |
| DDX17           | Gift from Douglas Black | UCLA                       | 1:500                |

### **Secondary Antibodies**

| <b>Antibody</b>                        | <b>Vendor</b>      | <b>Catolog/Institution</b> | <b>Concentration</b> |
|----------------------------------------|--------------------|----------------------------|----------------------|
| biotin-SP-conjugated Goat anti-Rat IgG | Jackson ImmunoLabs | 112-065-167                | 1:000 (CD68)         |
| Goat anti-Rabbit Antibody HRP          | Life Technologies  | 656120                     | 1:4000               |

**Figure 2k**

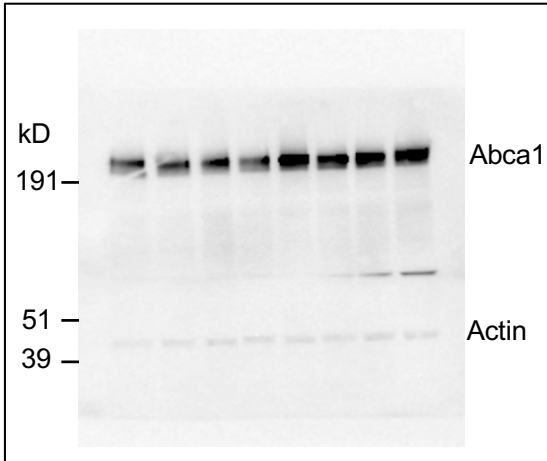

**Figure 2e**

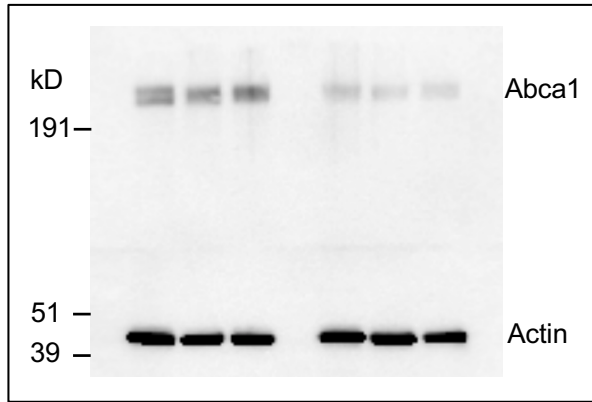

**Figure 5a**

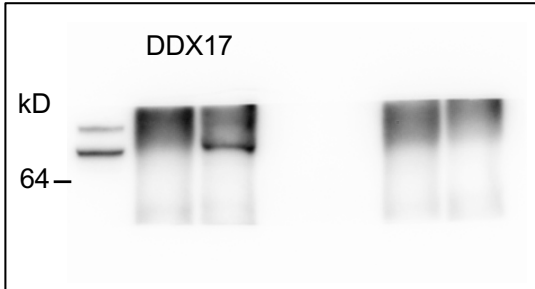

**Figure 5d**

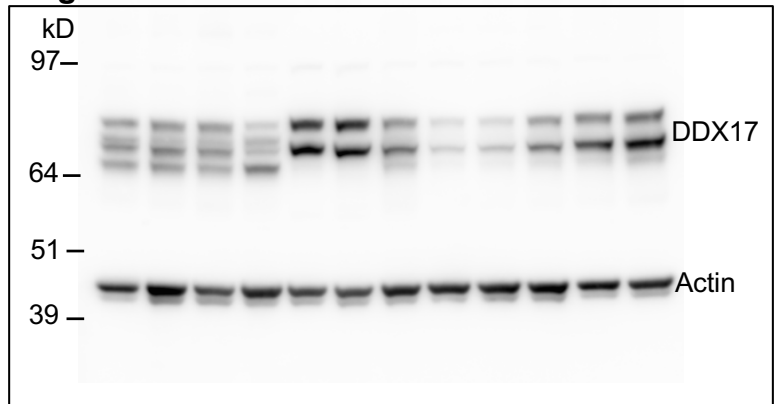

**Figure 5g**

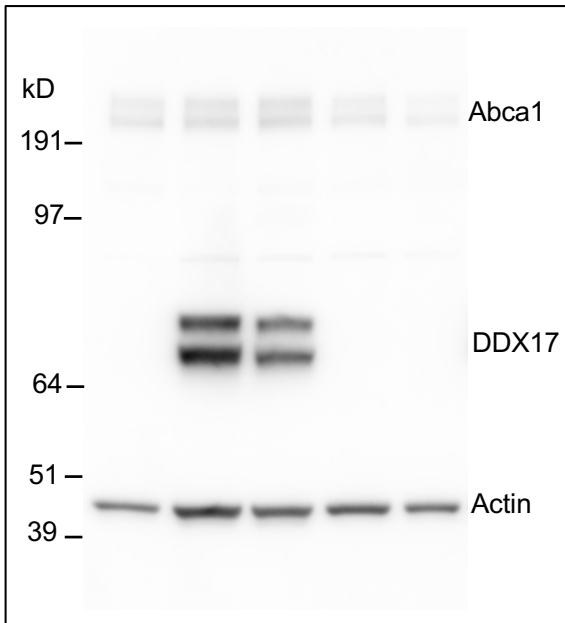

**Figure S5a**

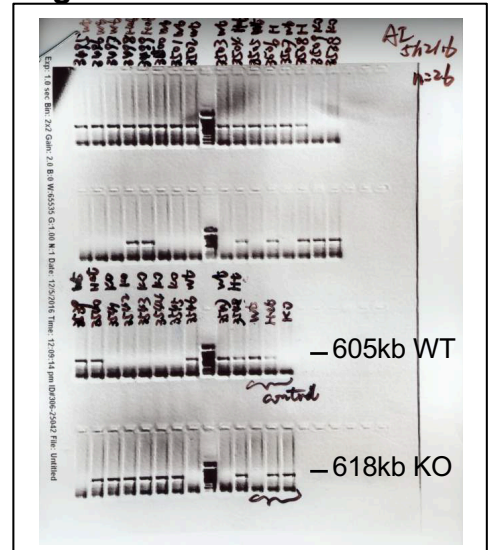

**Figure S4a**

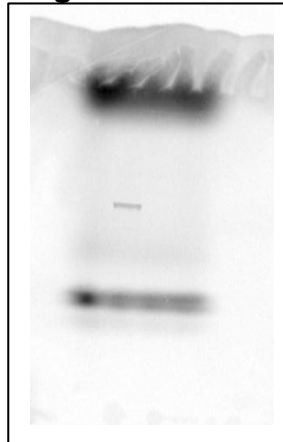

## Supplemental Table 1. LXR-Responsive LncRNAs

**Coding potential:** Coding potential (CP) score (in [0 1]) from CPAT. For mouse, CP<0.44 is used to classify non-coding nucleotide sequences

**Exons:** Maximal number of exons for transcripts in gene model

**Macrophages, DMSO:** Gene-level Expression estimates (FPKMs)

**Macrophages, GW3965:** Gene-level Expression estimates (FPKMs)

**GW-induced fold, macrophages** log<sub>2</sub>(fold-change) estimated from FPKM ratios (treated vs. control)

| Gene id       | Coding potential | Exons | Macrophages, DMSO | Macrophages, GW3965 | GW-induced fold, macrophages |
|---------------|------------------|-------|-------------------|---------------------|------------------------------|
| NONMMUG029258 | 0.14             | 1     | 1.17              | 14.16               | 3.60                         |
| NONMMUG021849 | 0.25             | 3     | 0.33              | 2.05                | 2.65                         |
| NONMMUG010862 | 0.03             | 1     | 1.74              | 10.26               | 2.56                         |
| NONMMUG020753 | 0.11             | 2     | 0.21              | 1.10                | 2.38                         |
| NONMMUG007384 | 0.33             | 2     | 0.88              | 3.89                | 2.15                         |
| NONMMUG031107 | 0.09             | 4     | 0.34              | 1.51                | 2.15                         |
| NONMMUG020801 | 0.03             | 1     | 11.46             | 48.64               | 2.09                         |
| NONMMUG044608 | 0.06             | 2     | 1.01              | 4.25                | 2.07                         |
| NONMMUG028796 | 0.08             | 1     | 0.61              | 2.34                | 1.95                         |
| NONMMUG040028 | 0.10             | 3     | 0.37              | 1.29                | 1.78                         |
| MeXis         | 0.11             | 2     | 0.69              | 2.36                | 1.78                         |
| NONMMUG014707 | 0.04             | 1     | 0.61              | 2.09                | 1.78                         |
| NONMMUG040696 | 0.01             | 1     | 0.98              | 3.26                | 1.73                         |
| NONMMUG025125 | 0.13             | 1     | 0.47              | 1.56                | 1.72                         |
| NONMMUG042323 | 0.07             | 1     | 1.86              | 5.58                | 1.58                         |
| NONMMUG020752 | 0.04             | 2     | 0.46              | 1.38                | 1.57                         |
| NONMMUG001098 | 0.17             | 2     | 0.89              | 2.54                | 1.52                         |
| NONMMUG002204 | 0.01             | 2     | 0.43              | 1.23                | 1.50                         |
| NONMMUG007882 | 0.07             | 1     | 0.43              | 1.18                | 1.45                         |
| NONMMUG036544 | 0.07             | 1     | 1.38              | 3.69                | 1.42                         |
| NONMMUG038049 | 0.10             | 2     | 0.56              | 1.43                | 1.34                         |
| 4930426I24Rik | 0.05             | 3     | 1.12              | 2.73                | 1.28                         |
| NONMMUG009249 | 0.00             | 1     | 2.40              | 5.84                | 1.28                         |
| NONMMUG000595 | 0.05             | 3     | 0.52              | 1.25                | 1.27                         |
| 4833417C18Rik | 0.02             | 3     | 0.75              | 1.80                | 1.26                         |
| NONMMUG038572 | 0.32             | 2     | 2.87              | 6.67                | 1.22                         |
| NONMMUG024603 | 0.01             | 1     | 1.14              | 2.64                | 1.21                         |
| NONMMUG008576 | 0.03             | 1     | 0.90              | 2.08                | 1.21                         |
| NONMMUG037641 | 0.02             | 1     | 3.19              | 7.28                | 1.19                         |
| NONMMUG020309 | 0.05             | 1     | 1.03              | 2.28                | 1.14                         |
| NONMMUG016240 | 0.07             | 1     | 1.07              | 2.36                | 1.14                         |
| NONMMUG041990 | 0.03             | 1     | 1.42              | 3.08                | 1.12                         |
| NONMMUG043449 | 0.02             | 1     | 0.77              | 1.67                | 1.11                         |
| NONMMUG002363 | 0.01             | 1     | 1.27              | 2.75                | 1.11                         |
| NONMMUG040304 | 0.01             | 1     | 5.23              | 11.27               | 1.11                         |
| NONMMUG041988 | 0.02             | 1     | 1.47              | 3.16                | 1.10                         |
| 4930599N23Rik | 0.33             | 4     | 0.55              | 1.17                | 1.10                         |
| NONMMUG035144 | 0.04             | 1     | 0.76              | 1.61                | 1.10                         |
| NONMMUG044541 | 0.01             | 1     | 0.57              | 1.22                | 1.09                         |
| NONMMUG007066 | 0.02             | 1     | 1.52              | 3.22                | 1.08                         |
| NONMMUG040149 | 0.02             | 1     | 0.53              | 1.11                | 1.06                         |
| NONMMUG008961 | 0.02             | 1     | 0.59              | 1.22                | 1.04                         |
| NONMMUG020822 | 0.06             | 1     | 0.69              | 1.42                | 1.03                         |
| NONMMUG038887 | 0.03             | 1     | 0.58              | 1.18                | 1.02                         |
| NONMMUG003326 | 0.02             | 1     | 0.54              | 1.10                | 1.02                         |
| NONMMUG037596 | 0.18             | 1     | 0.53              | 1.07                | 1.01                         |
| NONMMUG025132 | 0.17             | 1     | 1.53              | 3.08                | 1.01                         |

**Supplemental Table 3. Potential Open reading frames in the MeXis sequence.**

| <b>Frame</b> | <b>Strand</b> | <b>Frame</b> | <b>Start</b> | <b>Stop</b> | <b>Length (nt   aa)</b> |
|--------------|---------------|--------------|--------------|-------------|-------------------------|
| ORF1         | +             | 1            | 118          | 204         | 87   28                 |
| ORF10        | -             | 2            | 1277         | 1101        | 177   58                |
| ORF11        | -             | 2            | 1016         | 717         | 300   99                |
| ORF12        | -             | 2            | 200          | >3          | 198   65                |
| ORF13        | -             | 3            | 868          | 692         | 177   58                |
| ORF14        | -             | 3            | 283          | 80          | 204   67                |
| ORF2         | +             | 2            | 170          | 253         | 84   27                 |
| ORF3         | +             | 2            | 446          | 748         | 303   100               |
| ORF4         | +             | 2            | 1073         | 1387        | 315   104               |
| ORF5         | +             | 2            | 1460         | 1762        | 303   100               |
| ORF6         | +             | 3            | 147          | 356         | 210   69                |
| ORF7         | -             | 1            | 1866         | 1663        | 204   67                |
| ORF8         | -             | 1            | 798          | 667         | 132   43                |
| ORF9         | -             | 2            | 1580         | 1479        | 102   33                |

**Supplemental Table 4. Analysis of MeXis-responsive pathways comparing WT and MeXis<sup>-/-</sup> primary mouse macrophages.** Classified by DAVID Functional Annotation Tools (Confidence Interval 95%). One sample from each group pooled from 3 biologic replicates.

| Ingenuity Pathway                                        | -log (pvalue) |
|----------------------------------------------------------|---------------|
| Enzyme linked receptor protein signaling pathway         | 4.05          |
| Phosphorylation                                          | 3.84          |
| Phosphate metabolic process                              | 3.73          |
| Positive regulation of cell proliferation                | 3.39          |
| Protein amino acid phosphorylation                       | 3.26          |
| Transmembrane receptor protein tyrosine kinase signaling | 3.21          |
| Cation transport                                         | 2.77          |
| Steroid metabolic process                                | 2.67          |
| Cholesterol metabolic process                            | 2.21          |
| Metal ion transport                                      | 2.11          |
| Regulation of protein transport                          | 1.95          |
| Regulation of small GTPase mediated signal transduction  | 1.94          |
| Sterol metabolic process                                 | 1.92          |
| Ion transport                                            | 1.87          |
| Lipid localization                                       | 1.84          |
| Lipid transport                                          | 1.74          |
| Di-, tri-valent inorganic cation transport               | 1.37          |
| Regulation of DNA binding                                | 1.22          |
| Regulation of protein kinase cascade                     | 1.22          |
| Lymphocyte costimulation                                 | 1.14          |
| T cell costimulation                                     | 1.14          |
| Inflammatory response                                    | 1.03          |
